# Supplementary material for: Turning a Tumor Microenvironment Pitfall into Opportunity: Discovery of Benzamidoxime as PD-L1 Ligand with pH-Dependent Potency
Source: MDPI journal article supplement (doi:10.3390/ijms24065535), 2023-03-14
Supplement: s1 [file s1]

## Table of Contents:

**Figure S1.** Plot of the distance values (V1 and V2) resulting from the MDS analysis with ChemMine. Selected highly soluble fragments are red labelled (VIS1075-VIS1084). The confirmed hit compound (VIS310) is also labelled.

**Figure S2.** Molar fraction of VIS310 (**9**) microspecies as a function of pH. Relative abundancies of microspecies at pH 6.2 and 7.2 are reported at the bottom of the graph.

**Figure S3.** Molar fraction of VIS1201 (**17**) microspecies as function of pH. Relative abundancies of microspecies at pH 6.2 and 7.2 are reported at the bottom of the graph.

**Figure S4.** Binding mode of VIS1203 (**19**; yellow carbon atoms) to PD-L1. Residues of PD-L1 chain C are shown with orange carbon atoms (Asp122, Lys124) and blue carbon atoms (Phe19). Residues of PD-L1 chain D are shown with green carbon atoms (Tyr56, Gln66). Hydrogen bonds are shown as yellow dashed lines. Electrostatic interactions are shown as magenta dashed lines.

**Figure S5.** Binding mode of VIS1202 (**18**; yellow carbon atoms) to PD-L1. Residues of PD-L1 chain C are shown with orange carbon atoms (Ala121, Asp122) and blue carbon atoms (Phe19). Residues of PD-L1 chain D are shown with green carbon atoms (Tyr56) and orange carbon atoms (Met115). Hydrogen bonds are shown as yellow dashed lines. Cation- $\pi$  interactions are shown as green dashed lines.

**Figure S6.** Binding mode of VIS310 (**9**; yellow carbon atoms) to PD-L1. Residues of PD-L1 chain C are shown with orange carbon atoms (Ala121, Asp122) and blue carbon atoms (Phe19). Residues of PD-L1 chain D are shown with green carbon atoms (Tyr56, Gln66) and orange carbon atoms (Met115). Hydrogen bonds are shown as yellow dashed lines. Cation- $\pi$  interactions are shown as green dashed lines.

**Figure S7.** Binding mode of VIS1200 (**16**; yellow carbon atoms) to PD-L1. Residues of PD-L1 chain C are shown with orange carbon atoms (Asp122, Lys124). Residues of PD-L1 chain D are shown with green carbon atoms and orange carbon atoms (Met115). Hydrogen bonds are shown as yellow dashed lines.

**Figure S8.** Binding mode of VIS1204 (**20**; yellow carbon atoms) to PD-L1. Residues of PD-L1 chain C are shown with orange carbon atoms (Asp122, Lys124, Tyr123). Residues of PD-L1 chain D are shown with green carbon atoms (Tyr56). Hydrogen bonds are shown as yellow dashed lines. Cation- $\pi$  interactions are shown as green dashed lines.

**Table S1.** Virtual hit compounds with chemical structure (smile format), molecular weight (MW, Dalton) and binding energy scores (Score, kcal/mol). Compounds VIS1075-VIS1084 belong to the subset of highly soluble fragments. Remaining compounds are from the internal subset of readily available small molecules. Red typed entries indicate putative hit compounds according to single-point binding assays.

**Table S2.** Inflection temperature ( $T_i$ ), initial ratio and differential ( $\Delta$ ) ratio of wt-PD-L1 and labelled NT650/PD-L1 at pH 7.2 and 6.2.

**Table S3.**  $R^2$  values of the pKa assays according to the Yasuda-Shedlovsky method.

**Figure S1.** Plot of the distance values (V1 and V2) resulting from the MDS analysis with ChemMine. Selected highly soluble fragments are red labelled (VIS1075-VIS1084). The confirmed hit compound (VIS310) is also labelled.

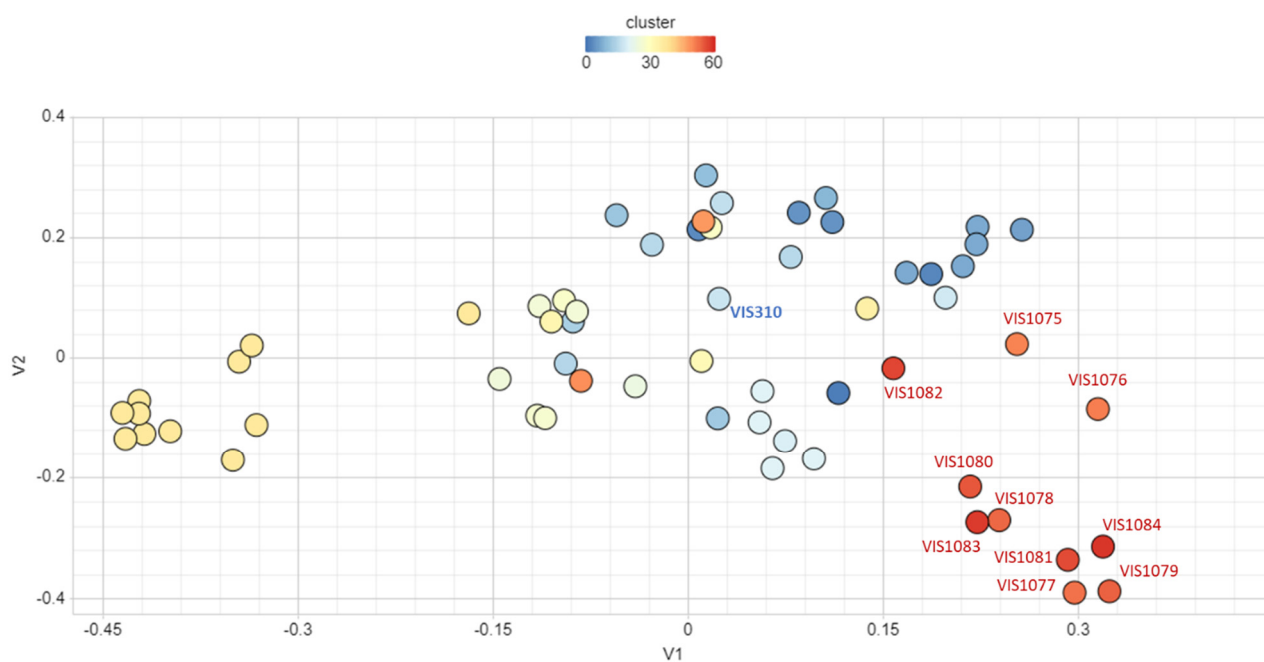

**Figure S2.** Molar fraction of VIS310 (**9**) microspecies as a function of pH. Relative abundances of microspecies at pH 6.2 and 7.2 are reported at the bottom of the graph.

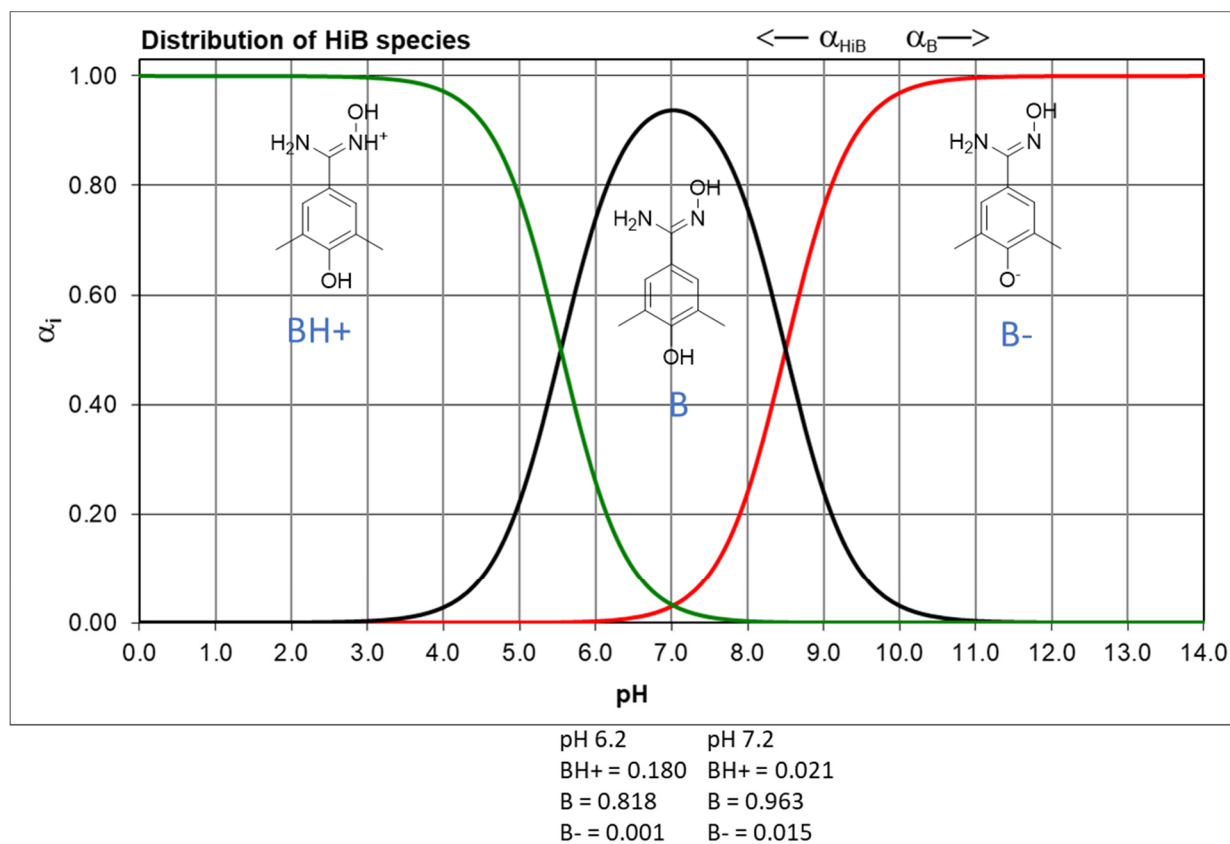

**Figure S3.** Molar fraction of VIS1201 (**17**) microspecies as function of pH. Relative abundances of microspecies at pH 6.2 and 7.2 are reported at the bottom of the graph.

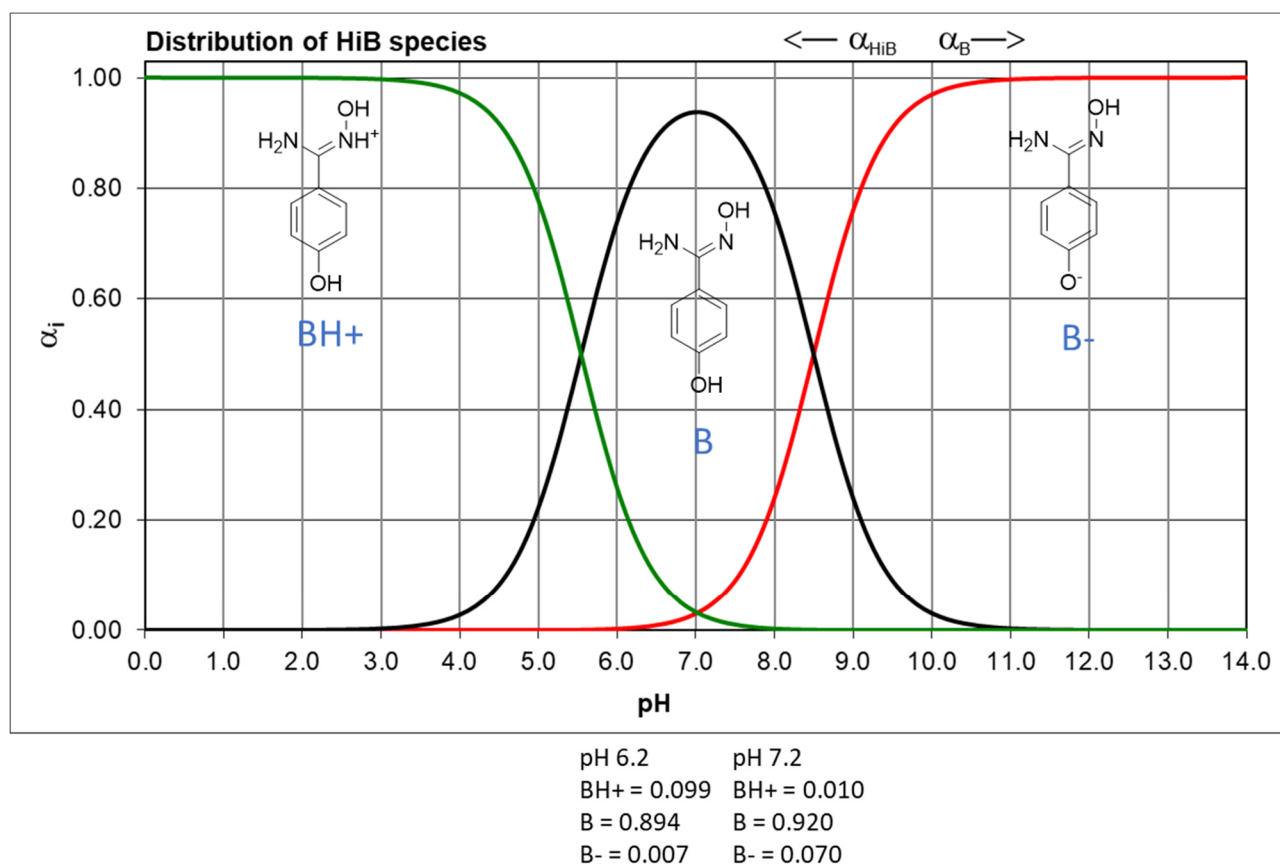

**Figure S4.** Binding mode of VIS1203 (**19**; yellow carbon atoms) to PD-L1. Residues of PD-L1 chain C are shown with orange carbon atoms (Asp122, Lys124) and blue carbon atoms (Phe19). Residues of PD-L1 chain D are shown with green carbon atoms (Tyr56, Gln66). Hydrogen bonds are shown as yellow dashed lines. Electrostatic interactions are shown as magenta dashed lines.

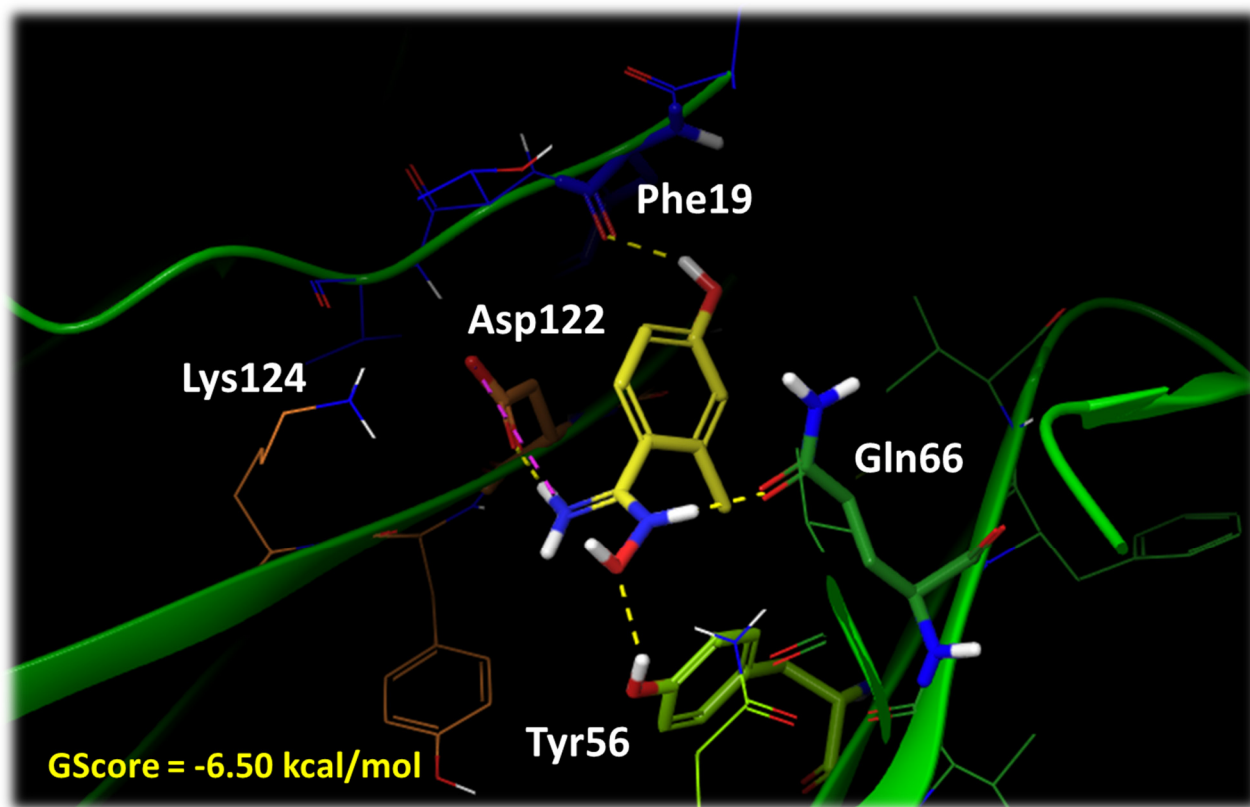

**Figure S5.** Binding mode of VIS1202 (**18**; yellow carbon atoms) to PD-L1. Residues of PD-L1 chain C are shown with orange carbon atoms (Ala121, Asp122) and blue carbon atoms (Phe19). Residues of PD-L1 chain D are shown with green carbon atoms (Tyr56) and orange carbon atoms (Met115). Hydrogen bonds are shown as yellow dashed lines. Cation- $\pi$  interactions are shown as green dashed lines.

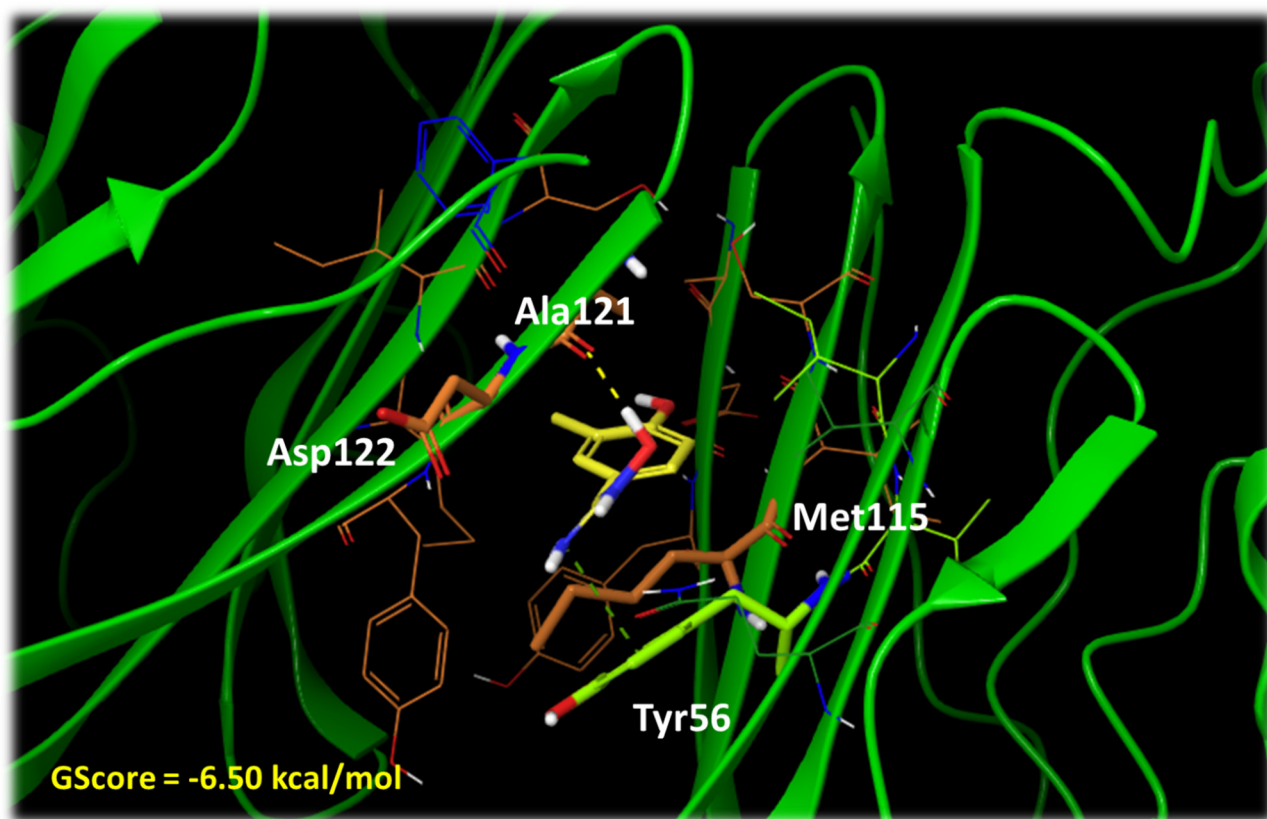

**Figure S6.** Binding mode of VIS310 (**9**; yellow carbon atoms) to PD-L1. Residues of PD-L1 chain C are shown with orange carbon atoms (Ala121, Asp122) and blue carbon atoms (Phe19). Residues of PD-L1 chain D are shown with green carbon atoms (Tyr56, Gln66) and orange carbon atoms (Met115). Hydrogen bonds are shown as yellow dashed lines. Cation- $\pi$  interactions are shown as green dashed lines.

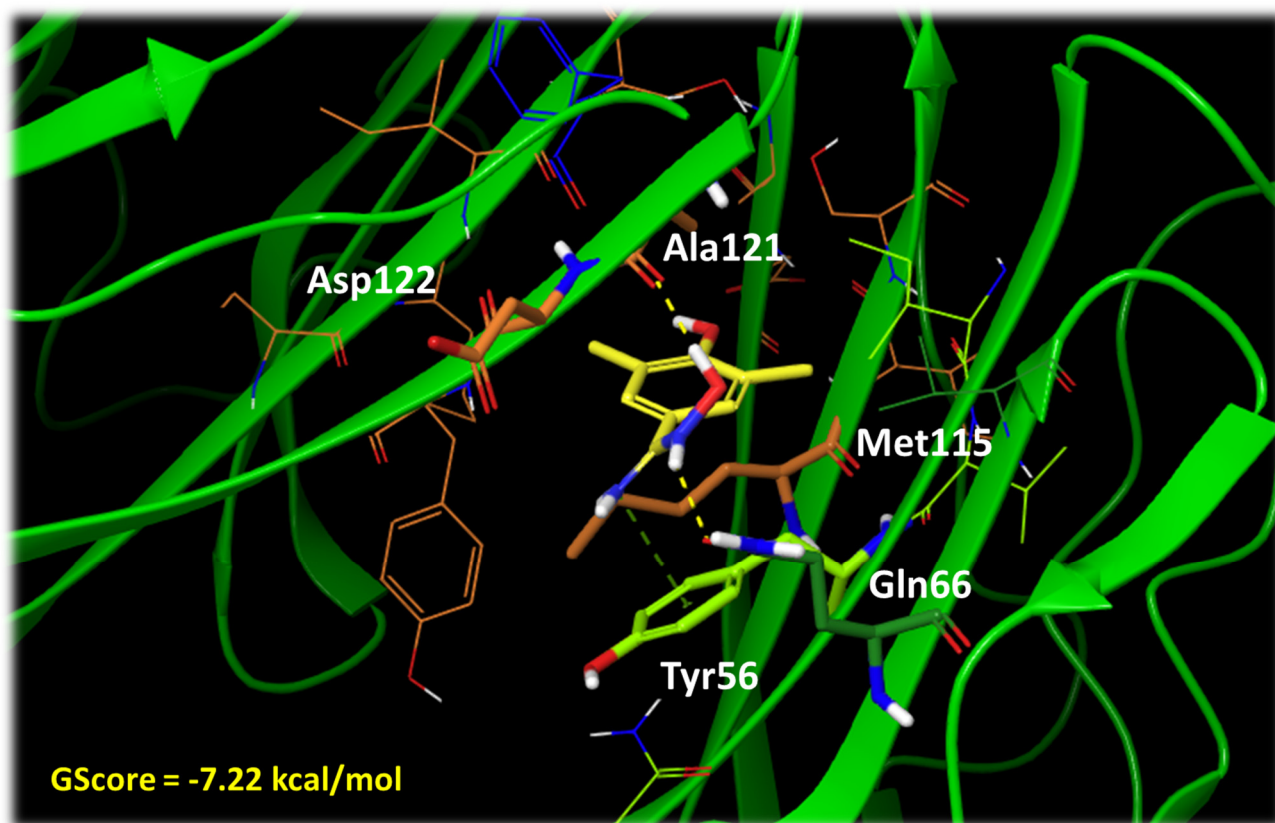



**Figure S7.** Binding mode of VIS1200 (**16**; yellow carbon atoms) to PD-L1. Residues of PD-L1 chain C are shown with orange carbon atoms (Asp122, Lys124). Residues of PD-L1 chain D are shown with green carbon atoms and orange carbon atoms (Met115). Hydrogen bonds are shown as yellow dashed lines.

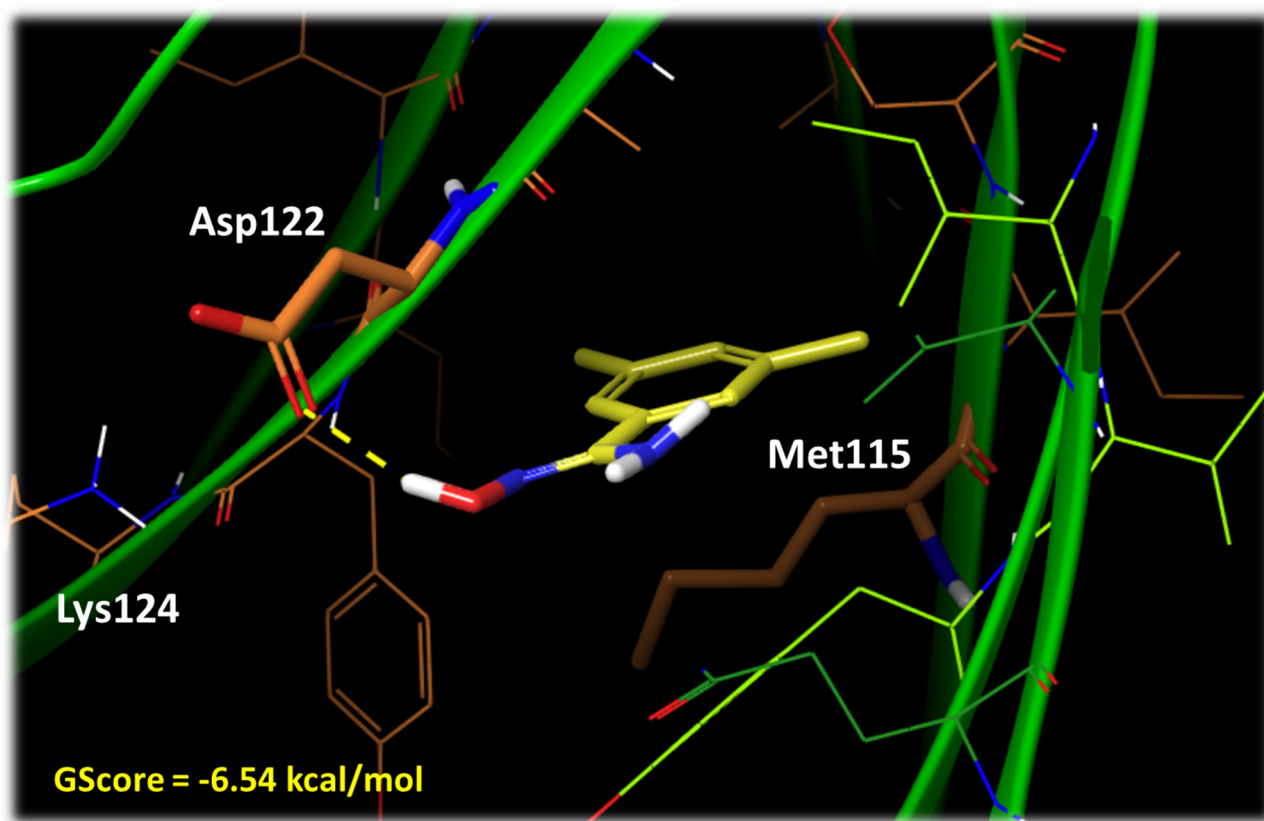

**Figure S8.** Binding mode of VIS1204 (**20**; yellow carbon atoms) to PD-L1. Residues of PD-L1 chain C are shown with orange carbon atoms (Asp122, Lys124, Tyr123). Residues of PD-L1 chain D are shown with green carbon atoms (Tyr56). Hydrogen bonds are shown as yellow dashed lines. Cation- $\pi$  interactions are shown as green dashed lines.

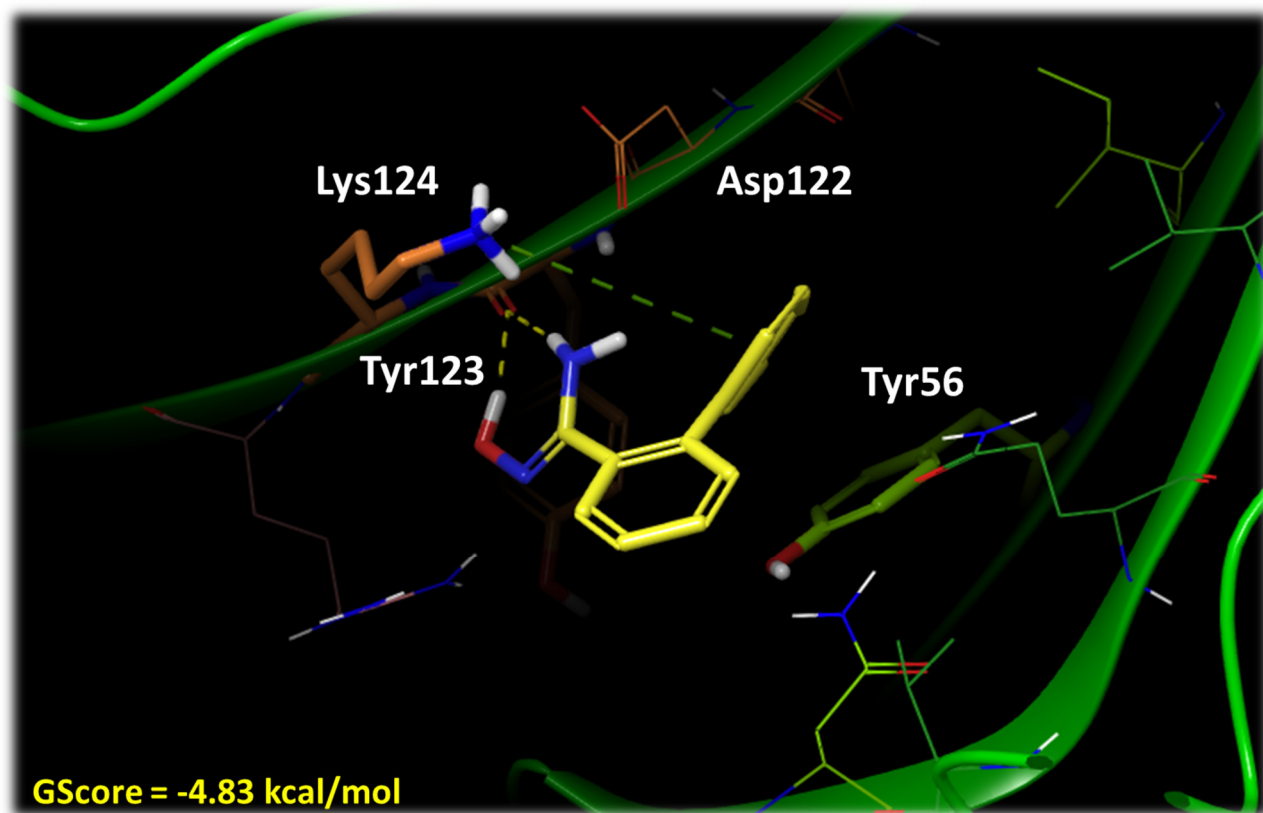

**Table S1.** Virtual hit compounds with chemical structure (smile format), molecular weight (MW, Dalton) and binding energy scores (Score, kcal/mol). Compounds VIS1075-VIS1084 belong to the subset of highly soluble fragments. Remaining compounds are from the internal subset of readily available small molecules. Red typed entries indicate putative hit compounds according to single-point binding assays.

| Compounds (VIS) | SMILES                                                                 | MW (Dalton) | Gscore (Kcal/mol) |
|-----------------|------------------------------------------------------------------------|-------------|-------------------|
| VIS209          | <chem>Cl.NCC(O)COCC1COC2=C(O1)C=CC=C2</chem>                           | 239         | -8.28             |
| VIS228          | <chem>NC[C@@H](O)c1cc(Cl)cc(Cl)c1</chem>                               | 206         | -8.05             |
| VIS260          | <chem>NC(=S)NNC(=O)c1cc(Br)ccc1</chem>                                 | 274         | -6.99             |
| VIS262          | <chem>C[C@@H](O)c(n1)[nH]c(c12)cccc2</chem>                            | 162         | -7.48             |
| VIS264          | <chem>CC[C@@H](O)c([nH]1)[nH+][c(c12)cccc2</chem>                      | 176         | -7.63             |
| VIS267          | <chem>[NH3+]CC[C@@H](O)c1cccc1</chem>                                  | 151         | -7.55             |
| VIS268          | <chem>FC(F)(F)c1ccc(cc1)[C@H](O)C[NH3+]</chem>                         | 205         | -8.71             |
| VIS270          | <chem>[NH3+]C[C@@H](O)c1ccc(C)cc1</chem>                               | 151         | -7.24             |
| VIS284          | <chem>[NH3+]CCSc1c[nH]c(c12)cccc2</chem>                               | 192         | -7.94             |
| VIS285          | <chem>NCc1n[nH]c(=O)c(c12)cccc2</chem>                                 | 175         | -7.05             |
| VIS287          | <chem>c1c[nH]c(=O)c(c12)cccc2O</chem>                                  | 161         | -6.80             |
| VIS300          | <chem>OCC[NH2+]C[C@@H](O)Cn(c1cccc2)c(c3c12)cccc3</chem>               | 284         | -7.02             |
| VIS303          | <chem>[H]/N=C\N1S[C@H](C1=O)CC(=O)Nc2cccc(c23)cccc3</chem>             | 299         | -9.13             |
| VIS307          | <chem>[nH+]1ccn(C)c1[C@@H](O)c2cc(OC)c(cc2)OC</chem>                   | 248         | -8.26             |
| VIS308          | <chem>[NH3+]Cc(n1)n(C(C)C)c(c12)cccc2</chem>                           | 189         | -8.14             |
| VIS309          | <chem>NCc1cc(ccc1)-c2nccs2</chem>                                      | 190         | -7.95             |
| VIS310          | <chem>ONC(=[NH2+])c1cc(C)c(O)c(C)c1</chem>                             | 180         | -7.22             |
| VIS315          | <chem>[NH3+]C[C@](C1)(O)CCc(c12)cccc2</chem>                           | 177         | -7.80             |
| VIS328          | <chem>C1COCC[NH+]1C[C@@H](O)COc2cccc(c23)cccc3</chem>                  | 287         | -8.42             |
| VIS343          | <chem>CNC[C@@H](O)Cn(c(C)C1C)c(c12)cccc2</chem>                        | 232         | -6.03             |
| VIS344          | <chem>CCN(CC)C[C@H](O)Cn(c(c1c23)C(=O)CCC1)c2cccc3</chem>              | 314         | -6.79             |
| VIS345          | <chem>CCN(CC)C[C@H](O)Cn(c(C)C1C)c(c12)cccc2</chem>                    | 274         | -5.97             |
| VIS346          | <chem>c1cccc(c12)n(c(C)C2C)C[C@@H](O)CNCc3ccco3</chem>                 | 298         | -6.84             |
| VIS471          | <chem>c1cccc(c12)[nH]cc2CCNC(=O)Cc3csc(n3)NC(=O)c4c(=O)[nH]ccc4</chem> | 421         | -8.46             |
| VIS542          | <chem>COC1=CC2=C(C=C1OC)C(NCC2)C1=CC=C(O)C=C1</chem>                   | 285         | -6.21             |
| VIS545          | <chem>FC1=CC=C(CNC(=O)C2=CC=C3N=CNC3=C2)C=C1</chem>                    | 269         | -9.09             |
| VIS549          | <chem>CN1C(O)=NC2=C1C(=O)N(CC1=CC=CC=C1)C(=O)N2C</chem>                | 286         | -7.80             |
| VIS566          | <chem>CC1=C(C(N2N=CN=C2N1)C1=CC=CN=C1)C(N)=O</chem>                    | 256         | -5.61             |
| VIS568          | <chem>NC(=O)CC1NC2=CC=CC=C2NC1=O</chem>                                | 205         | -7.54             |
| VIS573          | <chem>CC1=NC2=C(C=CC=C2)N1CC(N)=O</chem>                               | 189         | -7.54             |
| VIS582          | <chem>NCC(O)C1=CC2=C(OCC2)C=C1</chem>                                  | 179         | -8.66             |
| VIS584          | <chem>CC1=CC=C(CSC2=NC=C(CO)N2CC(N)=O)C=C1</chem>                      | 291         | -9.22             |
| VIS592          | <chem>NC(=O)CN1C(CC2=CC=CC=C2Cl)=NC2=CC=CC=C12</chem>                  | 300         | -8.56             |
| VIS597          | <chem>FC1=CC=C(C=C1)C1=C(NN=N1)C(=O)NCC1=CC=CC=N1</chem>               | 297         | -8.37             |
| VIS599          | <chem>NC(=O)C(=O)NCCC(O)C1=CC(Cl)=CC=C1</chem>                         | 257         | -8.15             |
| VIS724          | <chem>Cl.NC(CO)C(O)c1ccc(Cl)cc1</chem>                                 | 238         | -7.55             |
| VIS726          | <chem>Oc1cc2cccc(O)c(=O)c2c(O)c1O</chem>                               | 220         | -5.86             |
| VIS826          | <chem>CN1C2=C(N(CC3=CC=C(C)C=C3)C(S)=N2)C(=O)N(C)C1=O</chem>           | 316         | -6.05             |
| VIS868          | <chem>O=C(OC)C1=CC=C(O)C2=C1C3=C(OC2)C=CC=C3</chem>                    | 256         | -4.66             |
| VIS871          | <chem>CC(C1=C2C(C(OC)=O)=CC=C1)(C)OC3=C2C=CC=C3</chem>                 | 268         | -4.39             |
| VIS872          | <chem>CC(C1=C2C(C(OC)=O)=CC=C1O)(C)OC3=C2C=CC=C3</chem>                | 284         | -4.36             |
| VIS873          | <chem>O=C(OC)C1=CC=C(O)C2=C1C3=C(OC2C)C=CC=C3</chem>                   | 270         | -4.73             |

|          |                                                                     |     |       |
|----------|---------------------------------------------------------------------|-----|-------|
| VIS874   | <chem>OC(C1=CC=C(O)C2=C1C3=C(OC2)C=CC=C3)=O</chem>                  | 242 | -4.82 |
| VIS875   | <chem>CC(C1=C2C(C(OC)=O)=CC(CCC)=C1)(C)OC3=C2C=CC=C3</chem>         | 310 | -4.23 |
| VIS876   | <chem>O=C(OC)C1=CC=CC2=C1C3=C(OC2C4=CC=CC=C4)C=CC=C3</chem>         | 316 | -5.87 |
| VIS877   | <chem>OC(C1=CC=CC2=C1C3=C(OC2)C=CC=C3)=O</chem>                     | 226 | -4.76 |
| VIS878   | <chem>O=C(OC)C1=CC=C(OC(C)=O)C2=C1C3=C(OC2)C=CC=C3</chem>           | 298 | -5.08 |
| VIS879   | <chem>O=C(OC)C1=CC=C(C)C2=C1C3=C(OC2)C=CC=C3</chem>                 | 254 | -4.56 |
| VIS32926 | <chem>Nc1[nH]ncc1-c1ccc(F)cc1F</chem>                               | 195 | -7.71 |
| VIS1058  | <chem>O=C(NCC1=CC(CN2C=NC3=CC=CC=C23)=CC=C1)C1=CC=C(C=C1)C#N</chem> | 366 | -9.40 |
| VIS1075  | <chem>OC1CCC1NCc1ccncc1</chem>                                      | 178 | -6.49 |
| VIS1076  | <chem>OC1CCCC1n1ccnc1</chem>                                        | 152 | -7.00 |
| VIS1077  | <chem>CC(C)(C)C(=O)N1C[C@@H](O)[C@H](N2CCCC2)C1</chem>              | 240 | -7.88 |
| VIS1078  | <chem>Cl.O=S1(=O)CCC2(CCCN2)CC1</chem>                              | 189 | -6.29 |
| VIS1079  | <chem>C[C@]1(O)CC[C@H]1N1CC2CCCCC2C1</chem>                         | 209 | -7.61 |
| VIS1080  | <chem>CC1CCC2(CC1)NC(=O)NC2=O</chem>                                | 182 | -7.36 |
| VIS1081  | <chem>O=C1C(N2CCC(O)C2)CCN1CC(F)(F)F</chem>                         | 252 | -8.28 |
| VIS1082  | <chem>CC(C)(O)c1ncc[nH]1</chem>                                     | 126 | -5.62 |
| VIS1083  | <chem>CN(C)C(=O)C1(F)CCNC1</chem>                                   | 160 | -6.66 |
| VIS1084  | <chem>CN(C)C1CCC(O)CC1</chem>                                       | 143 | -5.80 |

**Table S2.** Inflection temperature (Ti), initial ratio and differential ( $\Delta$ ) ratio of wt-PD-L1 and labelled NT650/PD-L1 at pH 7.2 and 6.2.

| Sample             | Ti [°C]    | Initial Ratio | $\Delta$ Ratio |
|--------------------|------------|---------------|----------------|
| wt-PD-L1           | 61.36±0.15 | 0.67±0.01     | 0.29±0.02      |
| NT650/PD-L1 pH 7.2 | 60.63±0.58 | 0.71±0.01     | 0.24±0.03      |
| NT650/PD-L1 pH 6.2 | 60.73±0.49 | 0.66±0.01     | 0.26±0.03      |

**Table S3.** Calculated pKa ( $\text{calc pKa}$ ), experimental pKa and  $R^2$  values of the potentiometric assays according to the Yasuda-Shedlovsky method.

| Compound     | $\text{calc pKa}$<br>(Marvin, v20.11; 2021)                                                | pKa                                        | $R^2$                                  | % MeOH     | Temperature |
|--------------|--------------------------------------------------------------------------------------------|--------------------------------------------|----------------------------------------|------------|-------------|
| VIS310 (9)   | 5.60 ( $\text{calc pKa1}$ )<br>9.18 ( $\text{calc pKa2}$ )<br>11.02 ( $\text{calc pKa3}$ ) | $5.65 \pm 0.01$<br>$9.32 \pm 0.02$<br>n.d. | 0.9981 (pKa1)<br>0.9971 (pKa2)<br>n.d. | 50; 40; 30 | 25°C        |
| VIS1200 (16) | 5.24 ( $\text{calc pKa1}$ )<br>9.33 ( $\text{calc pKa2}$ )                                 | $5.26 \pm 0.01$<br>n.d.                    | 0.9999 (pKa1)<br>n.d.                  | 45; 40; 35 | 25°C        |
| VIS1201 (17) | 5.38 ( $\text{calc pKa1}$ )<br>8.70 ( $\text{calc pKa2}$ )<br>10.52 ( $\text{calc pKa3}$ ) | $5.35 \pm 0.12$<br>$8.64 \pm 0.01$<br>n.d. | 0.9999 (pKa1)<br>0.9999 (pKa2)<br>n.d. | 45; 40; 35 | 25°C        |
| VIS1202 (18) | 5.49 ( $\text{calc pKa1}$ )<br>8.96 ( $\text{calc pKa2}$ )<br>10.76 ( $\text{calc pKa3}$ ) | $5.38 \pm 0.01$<br>$8.97 \pm 0.03$<br>n.d. | 0.9976 (pKa1)<br>0.9959 (pKa2)<br>n.d. | 45; 40; 35 | 25°C        |
| VIS1203 (19) | 5.59 ( $\text{calc pKa1}$ )<br>8.94 ( $\text{calc pKa2}$ )<br>10.67 ( $\text{calc pKa3}$ ) | $5.38 \pm 0.01$<br>$9.17 \pm 0.02$<br>n.d. | 0.9998 (pKa1)<br>0.9971 (pKa2)<br>n.d. | 45; 40; 35 | 25°C        |
| VIS1204 (20) | 4.99 ( $\text{calc pKa1}$ )<br>9.02 ( $\text{calc pKa2}$ )                                 | $5.30 \pm 0.01$<br>n.d.                    | 0.9998 (pKa1)<br>n.d.                  | 45; 40; 35 | 25°C        |

n.d.: not determined (pKa out of the range of values of SiriusT3, pKa > 12).
